# Supplementary material for: Exceptional electrical and thermal transport properties in tunable all-graphene papers
Source: Royal Society of Chemistry journal article supplement (doi:10.1039/c5ra15533a), 2015-01-01
Supplement: c5ra15533a1.pdf [file c5ra15533a1.pdf]

## Supporting Information

### Exceptional electrical and thermal transport properties in tunable all-graphene papers

Lin Liu<sup>†</sup>, Xing-Ming Bian<sup>†,\*</sup>, Jin Tang<sup>†</sup>, Hong Xu<sup>†</sup>, Zhi-Ling Hou<sup>§,\*</sup>, Wei-Li Song<sup>‡,\*</sup>

<sup>†</sup>*State Key Laboratory of Alternate Electrical Power System with Renewable Energy Sources,  
North China Electric Power University, Beijing, 102206, China*

<sup>‡</sup>*Institute of Advanced Materials and Technology, University of Science and Technology Beijing,  
Beijing 100083, China*

<sup>§</sup>*School of Science, Beijing University of Chemical Technology, Beijing 100029, China*

\* Corresponding Authors: [bianxingming@ncepu.edu.cn](mailto:bianxingming@ncepu.edu.cn) (X. M. B.); [houlz@mail.buct.edu.cn](mailto:houlz@mail.buct.edu.cn) (Z. L. H.); [weilis@ustb.edu.cn](mailto:weilis@ustb.edu.cn) (W. L. S.).

**Table S1 Thermal conductivity of typical graphene- and graphite-based materials.**

| Conductive Fillers     | Matrix                | Filler loadings | Thermal conductivity (W/mK) | Refs      |
|------------------------|-----------------------|-----------------|-----------------------------|-----------|
| Graphite nanoplatelets | epoxy                 | 25 vol%         | 6.44                        | 1         |
| Graphene               | poly(vinyl alcohol)   | 40 vol%         | 30                          | 2         |
| Graphene               | epoxy                 | 10 wt%          | 1.53                        | 3         |
| Graphene               | epoxy                 | 25 wt%          | 2.67                        | 4         |
| fGNPs                  | polyphenylene sulfide | 40 wt%          | 4.414                       | 5         |
| LTEG                   | Polyamide 6           | 70 wt%          | 32.33                       | 6         |
| LTEG                   | Polyamide 6           | 60 wt%          | 21.05                       | 7         |
| Graphene               | epoxy                 | 10 vol%         | 5.1                         | 8         |
| GN                     | GO                    | 80 wt%          | 80                          | This work |

**References:**

- (1) A. Yu, P. Ramesh, M. E. Itkis, E. Bekyarova, R. C. Haddon, *J. Phys. Chem. C* 2007, **111**, 7565–7569.
- (2) W. L. Song, W. Wang, L. M. Veca, C. Y. Kong, M. S. Cao, P. Wang, M. J. Meziani, H. J. Qian, G. E. LeCroy, L. Cao, Y.-P. Sun, *J. Mater. Chem.* 2012, **22**, 17133–17139.
- (3) S. H. Song, K. H. Park, B. H. Kim, Y. W. Choi, G. H. Jun, D. J. Lee, B.-S. Kong, K.-W. Paik, S. Jeon, *Adv. Mater.* 2013, **25**, 732–737.

- (4) W. Guo, G. Chen, *J. Appl. Polym. Sci.* 2014, **131**, 40565.
- (5) J. Gu, J. Du, J. Dang, W. Geng, S. Hu, Q. Zhang, *RSC Adv.* 2014, **4**, 22101–22105.
- (6) S. Zhou, Y. Lei, H. Zou, M. Liang, *Polym. Compos.* 2013, **34**, 1816–1823.
- (7) S. Zhou, L. Yu, X. Song, J. Chang, H. Zou, M. Liang, *J. Appl. Polym. Sci.* 2014, **131**, 39596.
- (8) K. M. F. Shahil, A. A. Balandin, *Nano Lett.* 2012, **12**, 861–867.
